# Supplementary material
Source: PubMed Central journal article supplement (PMC7305187)

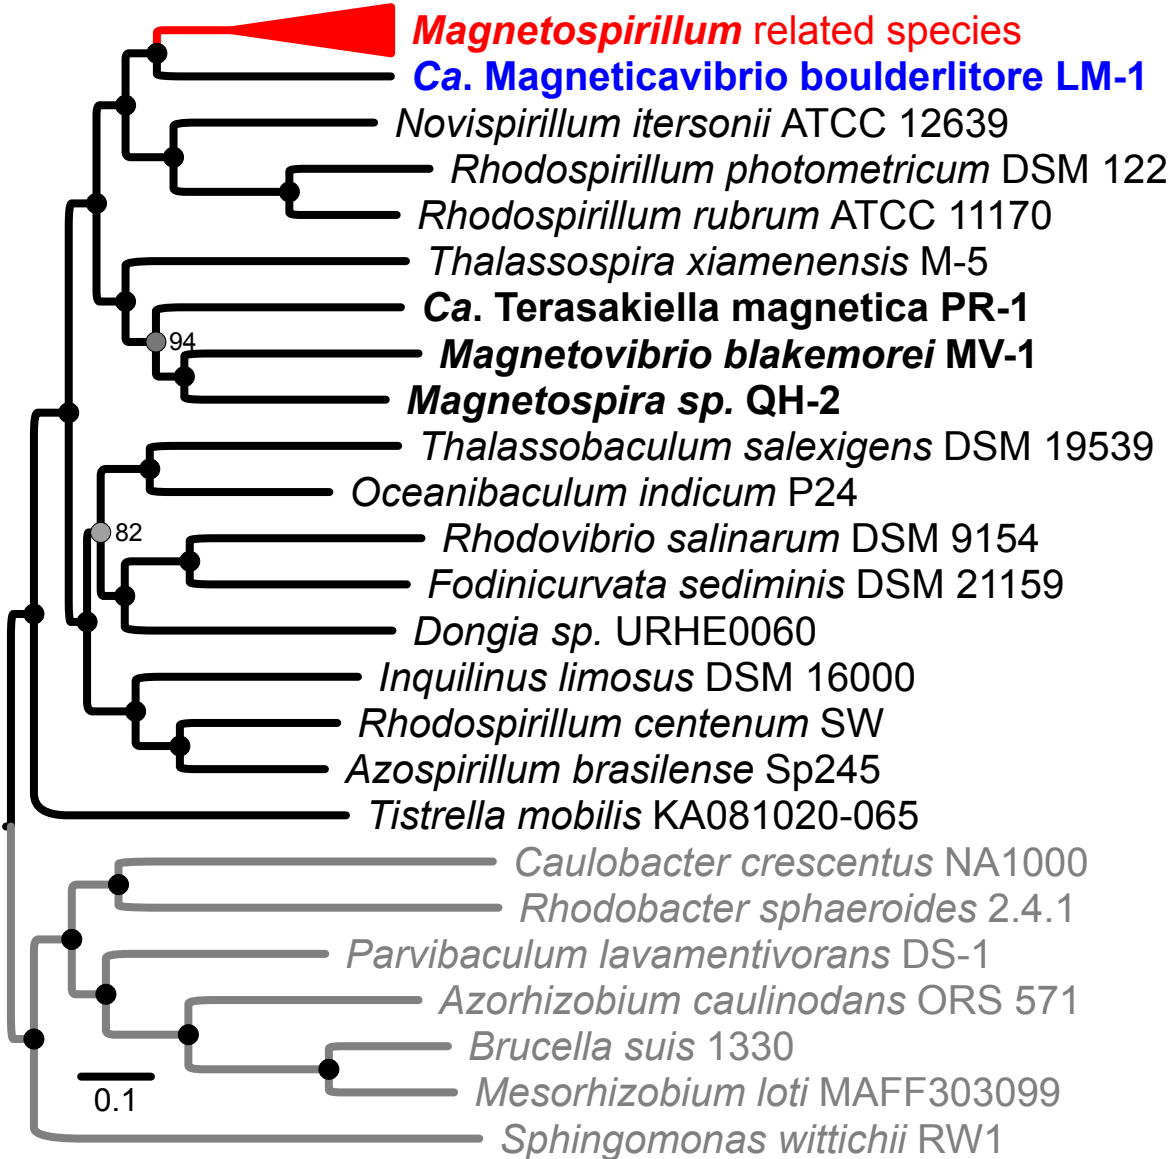

Alphaproteobacteria

Rhodospirillaceae

Supplement: 41396_2020_647_MOESM2_ESM.pdf [file 41396_2020_647_MOESM2_ESM.pdf]

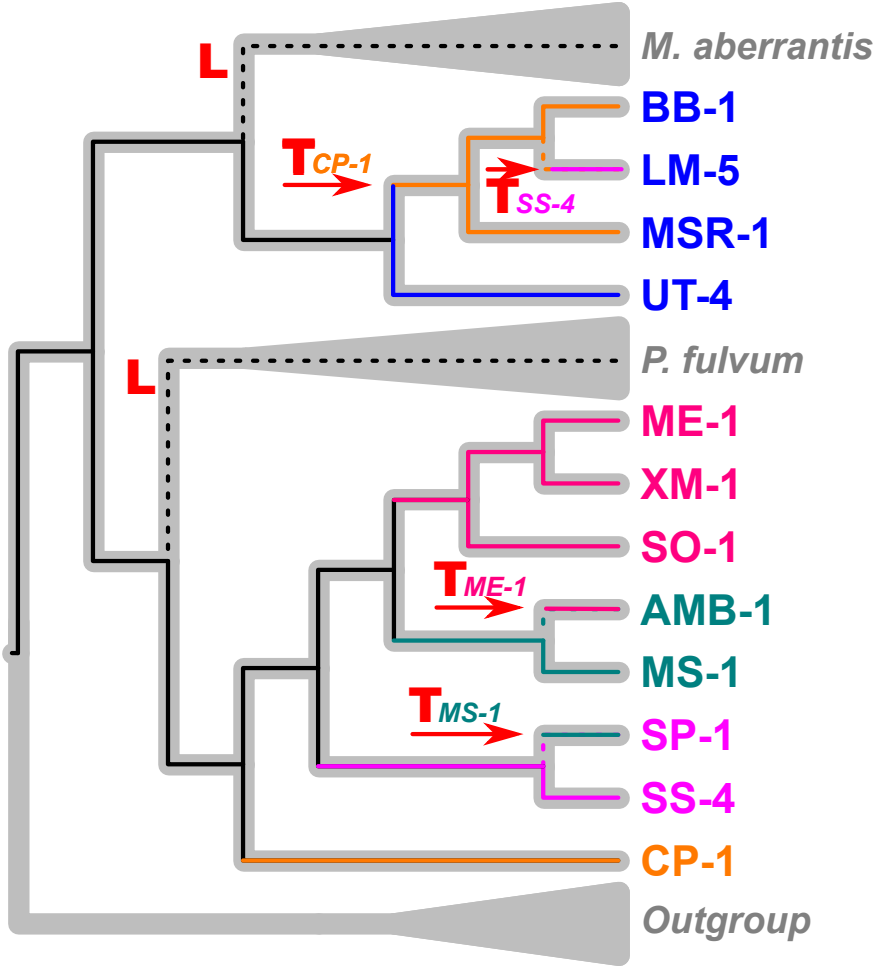

Supplement: 41396_2020_647_MOESM9_ESM.pdf [file 41396_2020_647_MOESM9_ESM.pdf]
